# Supplementary material for: Novel Complex of PD-L1 Aptamer and Holliday Junction Enhances Antitumor Efficacy in Vivo
Source: PubMed Central journal article supplement (PMC7921949; doi:10.3390/molecules26041067), 2021-02-18
Supplement: molecules-26-01067-s001.pdf [file molecules-26-01067-s001.pdf]

**Table S1.** Tumor volume measurements for the Apt and the Apt-HJ treatment groups

| <b>Apt</b> | <b>Day 7</b> | <b>Day 9</b> | <b>Day 11</b> | <b>Day 13</b> | <b>Day 15</b> | <b>Day 17</b> | <b>Day 19</b> |
|------------|--------------|--------------|---------------|---------------|---------------|---------------|---------------|
| Animal 1   | 7.47         | 9.40         | 20.00         | 32.48         | 38.58         | 95.37         | 142.19        |
| Animal 2   | 4.58         | 11.44        | 37.58         | 40.08         | 65.24         | 98.22         | 159.07        |
| Animal 3   | 0.50         | 0.86         | 12.36         | 22.23         | 51.59         | 141.82        | 262.26        |
| Animal 4   | 0.50         | 4.74         | 14.23         | 44.85         | 104.74        | 171.90        | 330.46        |
| Animal 5   | 11.80        | 19.35        | 33.69         | 51.28         | 81.97         | 164.80        | 200.32        |
| Animal 6   | 7.75         | 10.47        | 33.65         | 37.65         | 93.87         | 194.02        | 301.43        |
| Animal 7   | 12.91        | 15.92        | 27.63         | 53.03         | 107.41        | 192.19        | 218.13        |

  

| <b>Apt-HJ</b> | <b>Day 7</b> | <b>Day 9</b> | <b>Day 11</b> | <b>Day 13</b> | <b>Day 15</b> | <b>Day 17</b> | <b>Day 19</b> |
|---------------|--------------|--------------|---------------|---------------|---------------|---------------|---------------|
| Animal 1      | 0.50         | 1.69         | 3.47          | 11.63         | 63.98         | 71.63         | 111.60        |
| Animal 2      | 5.83         | 9.54         | 18.56         | 40.99         | 56.04         | 93.06         | 145.63        |
| Animal 3      | 2.97         | 4.37         | 14.70         | 19.79         | 53.72         | 101.94        | 174.82        |
| Animal 4      | 0.50         | 0.50         | 0.50          | 4.29          | 17.86         | 20.66         | 75.74         |
| Animal 5      | 3.91         | 6.57         | 8.35          | 34.85         | 68.12         | 136.76        | 189.30        |
| Animal 6      | 7.68         | 18.52        | 19.74         | 34.10         | 73.32         | 121.00        | 206.77        |
| Animal 7      | 0.50         | 0.73         | 1.69          | 3.08          | 7.05          | 16.65         | 25.08         |
